# Supplementary material for: A Cost-Effective Analysis of the CYCLE-HD Randomized Controlled Trial
Source: PubMed Central journal article supplement — Kidney Int Rep. 2021 Apr 8;6(6):1548–57. doi: 10.1016/j.ekir.2021.02.036 (PMC8207470; doi:10.1016/j.ekir.2021.02.036), 2021-04-08
Supplement: mmc1.pdf [file mmc1.pdf]

## Supplementary Material

### Table of Contents

|                                                                                                                                                                                                                                                                                                                                         |
|-----------------------------------------------------------------------------------------------------------------------------------------------------------------------------------------------------------------------------------------------------------------------------------------------------------------------------------------|
| <b>Supplementary Table 1: Sources of resource use and unit costs (UK£2017/18)</b>                                                                                                                                                                                                                                                       |
| <b>Supplementary Table 2: Summary of the base-case cost-effectiveness analysis</b>                                                                                                                                                                                                                                                      |
| <b>Supplementary Table 3: Table of missingness in the data</b>                                                                                                                                                                                                                                                                          |
| <b>Supplementary Table 4: Demographic for CYCLE-HD baseline study participants, participants completing the study protocol (not lost to follow up; all included in base-case cost analysis), and participants lost to follow up (e.g. moved away from haemodialysis centre, dropped out, etc; omitted from base-case cost-analysis)</b> |
| <b>Supplementary Table 5: Participant length of stay for hospital admissions</b>                                                                                                                                                                                                                                                        |
| <b>Supplementary Table 6: Summary of QALYs</b>                                                                                                                                                                                                                                                                                          |

**Supplementary Table 1: Sources of resource use and unit costs (UK£2017/18)**

|                                                                    | Value                                     | Source                                                                                                                                                                                                                                  |
|--------------------------------------------------------------------|-------------------------------------------|-----------------------------------------------------------------------------------------------------------------------------------------------------------------------------------------------------------------------------------------|
| <b>Inpatient costs</b>                                             |                                           |                                                                                                                                                                                                                                         |
| <i>A&amp;E</i>                                                     | £160.00                                   | <a href="https://improvement.nhs.uk/resources/national-cost-collection/#ncc1819">https://improvement.nhs.uk/resources/national-cost-collection/#ncc1819</a>                                                                             |
| <i>Ward (non-elective) per attending physician</i>                 | £3,117.00                                 |                                                                                                                                                                                                                                         |
| <i>Excess bed day</i>                                              | £337.00                                   |                                                                                                                                                                                                                                         |
| <i>Elective ward per attending physician</i>                       | £3,894.00                                 |                                                                                                                                                                                                                                         |
| <i>Excess bed day*</i>                                             | £431.00                                   |                                                                                                                                                                                                                                         |
| <i>HDU / Critical Care</i>                                         | £1,159.00                                 |                                                                                                                                                                                                                                         |
| <i>Day case per attending physician</i>                            | £742.00                                   |                                                                                                                                                                                                                                         |
| <b>Outpatient attendance costs per clinic type</b>                 | £140                                      | <a href="https://improvement.nhs.uk/resources/national-cost-collection/#ncc1819">https://improvement.nhs.uk/resources/national-cost-collection/#ncc1819</a>                                                                             |
| <b>Medication costs</b>                                            |                                           | British National Formulary 2017<br><a href="https://www.bnf.org/products/bnf-online/">https://www.bnf.org/products/bnf-online/</a>                                                                                                      |
| <b>Primary Care consultation costs</b>                             |                                           |                                                                                                                                                                                                                                         |
| <i>General Practitioner appointment</i>                            | £38.00                                    | Personal Social Services Research Unit. Unit costs of health and social care 2017.<br><a href="https://www.pssru.ac.uk/project-pages/unit-costs/unit-costs-2017/">https://www.pssru.ac.uk/project-pages/unit-costs/unit-costs-2017/</a> |
| <i>Practice Nurse appointment</i>                                  | £10.50                                    |                                                                                                                                                                                                                                         |
| <i>Health Care Assistant appointment</i>                           | £7.25                                     |                                                                                                                                                                                                                                         |
| <i>Other</i>                                                       | £7.25                                     |                                                                                                                                                                                                                                         |
| <i>Home Visit General Practitioner</i>                             | £48.00                                    |                                                                                                                                                                                                                                         |
| <i>General Practitioner Telephone appointment</i>                  | £14.80                                    |                                                                                                                                                                                                                                         |
| <i>Home Visit Community Health Professional</i>                    | £45.00                                    |                                                                                                                                                                                                                                         |
| <b>Physiotherapist assistant -Band 4 (intervention group only)</b> |                                           |                                                                                                                                                                                                                                         |
| <i>Cost per hour</i>                                               | £30                                       | Personal Social Services Research Unit. Unit costs of health and social care 2017.<br><a href="https://www.pssru.ac.uk/project-pages/unit-costs/unit-costs-2017/">https://www.pssru.ac.uk/project-pages/unit-costs/unit-costs-2017/</a> |
| <i>Time with patient per week</i>                                  | 0.25 hrs per session, 3 sessions per week | Trial intervention                                                                                                                                                                                                                      |
| <i>Cost per patient over 6 months</i>                              | £701.30                                   |                                                                                                                                                                                                                                         |
| <b>IDC bike (intervention group only)</b>                          |                                           |                                                                                                                                                                                                                                         |
| <i>Cost per IDC bike</i>                                           | £6000                                     | <a href="https://www.medimotion.co.uk/">https://www.medimotion.co.uk/</a>                                                                                                                                                               |
| <i>Lifetime of IDC bike</i>                                        | 3 years                                   | Assumption based on trial intervention                                                                                                                                                                                                  |
| <i>Equivalent annual cost of bike (interest rate 5%)</i>           | £2203.29                                  |                                                                                                                                                                                                                                         |
| <i>Participant per IDC bike</i>                                    | 18                                        | Assumption based on trial intervention                                                                                                                                                                                                  |
| <i>Cost per participant over 6 months</i>                          | £61.20                                    |                                                                                                                                                                                                                                         |

**Supplementary Table 2: Summary of the base-case cost-effectiveness analysis**

|                                        |                                                                                                                                           |
|----------------------------------------|-------------------------------------------------------------------------------------------------------------------------------------------|
| Type of evaluation                     | Cost-utility analysis                                                                                                                     |
| Time horizon                           | 6 month trial period extended to 12 months (6 month trial period, plus 6-month post trial)                                                |
| Perspective                            | Healthcare service                                                                                                                        |
| Comparators                            | Usual haemodialysis therapy (control group) versus Usual haemodialysis therapy plus the intervention of intradialytic cycling (IDC group) |
| Cost categories                        | Hospital costs<br>Prescribed medications costs<br>Primary care costs<br>Intervention costs                                                |
| Base year for calculating costs/prices | 2017/18                                                                                                                                   |
| Analytic methods                       | Cost-effectiveness model with multiple imputation and bootstrapping                                                                       |
| Outcomes                               | Cost per QALY                                                                                                                             |

**Supplementary Table 3: Table of missingness in the data**

|                               | Control group |                     |                             | IDC group     |                     |                             |
|-------------------------------|---------------|---------------------|-----------------------------|---------------|---------------------|-----------------------------|
|                               | Complete Data | Missing observation | Withdrawn/Lost to follow-up | Complete Data | Missing observation | Withdrawn/Lost to follow-up |
| <b>At baseline (0 months)</b> |               |                     |                             |               |                     |                             |
| GP costs                      | 59            | 6                   | 0                           | 55            | 10                  | 0                           |
| Hospital costs                | 65            | 0                   | 0                           | 65            | 0                   | 0                           |
| Medication costs              | 65            | 0                   | 0                           | 65            | 0                   | 0                           |
| EQ-5D                         | 54            | 9                   | 0                           | 60            | 5                   | 0                           |
| LV Mass                       | 65            | 0                   | 0                           | 65            | 0                   | 0                           |
| <b>At 3 months</b>            |               |                     |                             |               |                     |                             |
| EQ-5D                         | 49            | 16                  | 0                           | 48            | 17                  | 0                           |
| <b>At 6 months</b>            |               |                     |                             |               |                     |                             |
| GP costs                      | 51            | 5                   | 9                           | 44            | 9                   | 12                          |
| Hospital costs                | 56            | 0                   | 9                           | 53            | 0                   | 12                          |
| Medication costs              | 56            | 0                   | 9                           | 53            | 0                   | 12                          |
| EQ-5D                         | 51            | 5                   | 9                           | 50            | 3                   | 12                          |
| LV Mass                       | 50            | 7                   | 9                           | 51            | 2                   | 12                          |
| <b>At 12 months</b>           |               |                     |                             |               |                     |                             |
| GP costs                      | 44            | 5                   | 16                          | 43            | 8                   | 14                          |
| Hospital costs                | 49            | 0                   | 16                          | 51            | 0                   | 14                          |
| Medication costs              | 49            | 0                   | 16                          | 51            | 0                   | 14                          |

**Data presented as number (n)**

**Supplementary Table 4: Demographic for CYCLE-HD baseline study participants, participants completing the study protocol (not lost to follow up; all included in base-case cost analysis), and participants lost to follow up (e.g. moved away from haemodialysis centre, dropped out, etc; omitted from base-case cost-analysis)**

|                               | Baseline demographic for CYCLE-HD study population |                  | Baseline demographic of participants completing the study protocol |                  | Baseline demographic of participants lost to follow up |                  |
|-------------------------------|----------------------------------------------------|------------------|--------------------------------------------------------------------|------------------|--------------------------------------------------------|------------------|
|                               | Control group (n=65)                               | IDC group (n=65) | Control group (n=49)                                               | IDC group (n=51) | Control group (n=16)                                   | IDC group (n=14) |
| Age (years)                   | 59±15                                              | 56±16            | 59.5±13.5                                                          | 55.1 ± 15.2      | 57.1 ±19.1                                             | 56.8±16.8        |
| Male sex (%)                  | 53 (81.5%)                                         | 42 (64.6%)       | 38 (78%)                                                           | 32 (63%)         | 15 (94%)                                               | 10 (71%)         |
| Dialysis vintage (years)      | 1.3 [0.4, 3.2]                                     | 1.2 [0.5, 3.7]   | 1.2 [0.4, 2.8]                                                     | 1.2 [0.6, 2.5]   | 1.8 [1.1, 3.4]                                         | 1.0 [0.4, 5.7]   |
| Ethnicity                     |                                                    |                  |                                                                    |                  |                                                        |                  |
| White (n)                     | 28                                                 | 30               | 19                                                                 | 27               | 9                                                      | 3                |
| Mixed (n)                     | 0                                                  | 2                | 0                                                                  | 2                | 0                                                      | 0                |
| Asian or Asian British (n)    | 29                                                 | 24               | 22                                                                 | 17               | 7                                                      | 7                |
| Black or Black British (n)    | 5                                                  | 5                | 5                                                                  | 2                | 0                                                      | 3                |
| Other                         | 3                                                  | 4                | 3                                                                  | 3                | 0                                                      | 1                |
| Predialysis SBP (mmHg)        | 143.0±20.3                                         | 143.1±23.3       | 143.7±20.6                                                         | 140.9±21.5       | 140.6±19.8                                             | 151.1±28.1       |
| Predialysis DBP (mmHg)        | 75.1±13.6                                          | 77.1±14.2        | 73.7±13.4                                                          | 76.5±13.6        | 79.3±13.7                                              | 79.4±16.6        |
| Resting heart rate (bpm)      | 75.2±11                                            | 78.9±12.5        | 77.5±10.5                                                          | 80.8±12.0        | 69.8±31.7                                              | 77.4±10.5        |
| Pre-dialysis weight (kg)      | 77.3±17.2                                          | 80.6±20.8        | 79.9±21.8                                                          | 78.7 ±16.5       | 81.4±18.2                                              | 74.0±19.4        |
| <b>Co-morbidities</b>         | (n=65)                                             | (n=64)           | (n=49)                                                             | (n=51)           | (n=16)                                                 | (n=14)           |
| Ischemic heart disease (n)    | 9                                                  | 7                | 8                                                                  | 6                | 1                                                      | 1                |
| Hypertension (n)              | 44                                                 | 42               | 34                                                                 | 34               | 10                                                     | 8                |
| Diabetes mellitus (n)         | 28                                                 | 21               | 21                                                                 | 16               | 7                                                      | 5                |
| Atrial Fibrillation (n)       | 2                                                  | 3                | 0                                                                  | 2                | 2                                                      | 1                |
| Previous renal transplant (n) | 11                                                 | 9                | 8                                                                  | 7                | 3                                                      | 2                |

Data presented as either mean ± standard deviation, median {[range] or number (n)}.

**Supplementary Table 5: Participant length of stay for hospital admissions**

|                       | Control group            |                             |                           | IDC group                |                             |                           |
|-----------------------|--------------------------|-----------------------------|---------------------------|--------------------------|-----------------------------|---------------------------|
|                       | 6-month pre trial (n=65) | 6 month trial period (n=56) | 6-month post trial (n=49) | 6-month pre trial (n=65) | 6 month trial period (n=53) | 6-month post trial (n=51) |
| Length of stay (Days) | 1.0 (0.0, 3.5)           | 0.5 (0.0,4.0)               | 1.0 (0.0,5.0)             | 1.0 (0.0,6.0)            | 0.0 (0.0,2.0)               | 0.0 (0.0,2.0)             |

Data presented as median (interquartile range).

**Supplementary Table 6: Summary of QALYs**

|                                 | Control group |                    |                            | IDC group |                    |                            | IDC group vs Control group                 |
|---------------------------------|---------------|--------------------|----------------------------|-----------|--------------------|----------------------------|--------------------------------------------|
|                                 | n=            | Mean (SD)          | Median (IQR)               | n=        | Mean (SD)          | Median (IQR)               | Mean difference (95% confidence interval*) |
| <b>EQ-5D-5L (Utility score)</b> |               |                    |                            |           |                    |                            |                                            |
| 0 months                        | 56            | 0.7145<br>(0.2913) | 0.8017<br>(0.4819, 0.9390) | 60        | 0.6690<br>(0.2977) | 0.7431<br>(0.6251, 0.8868) | -0.0455<br>(-0.1541, 0.0613)               |
| 3 months                        | 49            | 0.6864<br>(0.2651) | 0.7252<br>(0.5240, 0.8926) | 48        | 0.7155<br>(0.2958) | 0.8162<br>(0.6203, 0.9328) | 0.0291<br>(-0.0817, 0.1400)                |
| 6 months                        | 45            | 0.6311<br>(0.2762) | 0.6720<br>(0.4369, 0.8510) | 48        | 0.7386<br>(0.2453) | 0.7930<br>(0.6701, 0.9420) | 0.1075<br>(0.0021, 0.2135)                 |

\* based on 5000 bootstrapped samples
